1 **Title:** Regulation of trophic architecture across spatial scales in a major river network

2

3 **Authors:** Eric Harvey<sup>1,2,3\*</sup> and Florian Altermatt<sup>1,2</sup>

4

5 **Corresponding Author:** [eric.harvey@utoronto.ca](mailto:eric.harvey@utoronto.ca)

6

7 **Affiliations:**

8 <sup>1</sup>Department of Evolutionary Biology and Environmental Studies, University of Zurich,  
9 Winterthurerstrasse 190, CH-8057 Zürich, Switzerland.

10 <sup>2</sup>Eawag, Swiss Federal Institute of Aquatic Science and Technology, Department of  
11 Aquatic Ecology, Überlandstrasse 133, CH-8600 Dübendorf, Switzerland

12 <sup>3</sup>Department of Ecology and Evolutionary Biology, University of Toronto, Canada, M5S  
13 3B2.

14 **Author contributions**

15 EH and FA designed the research; FA provided the data; EH processed and analysed the  
16 data; EH wrote the first draft of the manuscript; EH and FA contributed for further  
17 manuscript revisions.

18 **Abstract**

19 Moving beyond species count data is an essential step to better understand the effects of  
20 environmental perturbations on biodiversity and ecosystem functions, and to eventually  
21 better predict the strength and direction of those effects. Here, coupling an integrative  
22 path analysis approach with data from an extensive countrywide monitoring program, we  
23 tested the main spatial, environmental and anthropogenic drivers of change in stream  
24 macroinvertebrate trophic structure along the entire Swiss Rhine river catchment. Trophic  
25 structure was largely driven by inherent altitudinal variation influencing and cascading to  
26 regional scaled factors such as land use change and position in the riverine network,  
27 which, in turn, transformed local habitat structure variables. Those cascading effects  
28 across scales propagated through the biotic community, first affecting preys and, in turn,  
29 predators. Our results illustrate how seemingly less important factors can act as essential  
30 transmission belts, propagating through direct and indirect pathways across scales to  
31 generate the specific context in which each trophic group will thrive or not, leading to  
32 characteristic landscape wide variations in trophic community structure.

33

34 **Keywords:** Dendritic network, biodiversity, land-use change, metacommunity, trophic  
35 networks, food webs

## 36 INTRODUCTION

37 River ecosystems constitute iconic examples of spatial complexity with complex regional  
38 scale vertical structures (from upstream to downstream; the river network) constraining  
39 organism and energy movement<sup>1-5</sup>, but also strong localized horizontal interactions with  
40 the terrestrial matrix influencing local habitat characteristics through changes in cross-  
41 ecosystem subsidy<sup>6-8</sup>. The shape of river networks, which all follows the same geometric  
42 scaling properties<sup>2</sup>, has been shown to influence biological community dynamics and  
43 local species richness patterns<sup>3,5,9-12</sup>. However, recent studies have found that the relative  
44 importance of the regional river network and local habitat characteristics is somewhat  
45 context-dependant as a function of species traits (e.g., dispersal mode) and location-  
46 specific conditions such as terrestrial land-use and biotic interactions<sup>13-15</sup>. Although those  
47 studies tend to emphasize the importance of considering both local and regional factors to  
48 understand variations in aquatic community, total explanatory power remains generally  
49 low<sup>16</sup>. In that context, the use of well-defined functional or trophic groups each including  
50 taxonomically different but functionally similar taxa could improve explanatory power by  
51 generating groups of taxa with more uniform response to specific environmental or  
52 spatial characteristics<sup>17</sup>.

53 In addition, current approaches tend to focus on the relative importance of regional versus  
54 local factors to identify the dominant drivers while totally ignoring the inherent structure  
55 of interdependences among regional and local factors leading to a general loss of  
56 explanatory power<sup>16,18-23</sup>. The often-assumed dichotomy between regional and local  
57 factors generally erodes when considering the mechanisms behind those effects<sup>22,24</sup>. For  
58 instance, many regional factors, such as altitude, do not have any direct mechanistic

59 effects on community structure, but rather influence local factors that, in turn, will  
60 causally impact communities. Other regional factors, however, such as land-use cover are  
61 likely to have both direct (e.g., changes in habitat structure) and indirect (e.g., changes in  
62 water chemical quality) impacts on aquatic communities. Thus, local factors that may  
63 seem less important at first might effectively act as transmission belts, propagating a part  
64 or the total effects of some regional factors on community structure. Those effects are  
65 then likely to propagate within biological communities as a function of biotic interactions  
66 (e.g., effects on preys, which in turn, affect predators). Overall, we cannot rely on whole-  
67 community endpoint biodiversity measurements only, such as local species richness, to  
68 understand the direct and indirect pathways by which regional and local factors interact  
69 and propagate through biological communities to influence their structure and function<sup>25-</sup>  
70 <sup>27</sup>.

71 Here, we disentangled the main spatial, environmental and anthropogenic drivers shaping  
72 stream macroinvertebrate trophic structure across an entire river catchment. Starting from  
73 abundance data from a Swiss-wide biodiversity-monitoring program we collected  
74 functional traits on each taxon to reconstruct the trophic structure of each local  
75 community for 364 sites covering the entire Swiss Rhine river catchment. Integrating  
76 data related to land-use change, local water chemical and physical properties, regional  
77 factors related to altitude and position along the dendritic network, we used an integrative  
78 path analysis framework to identify specific pathways by which factors interact across  
79 spatial scales to affect stream invertebrate trophic structure.

80

81

## 82 RESULTS

83 Testing the main spatial, environmental and anthropogenic drivers of aquatic  
84 macroinvertebrate trophic structure along the Swiss Rhine river catchment we found that  
85 variations in relative (Figure 1,2) and absolute (Figure 3) abundances of each trophic  
86 group across the whole river basin was largely driven by altitudinal variations (Table 1  
87 and Figure 2). In turn, altitude influenced several other regional and local scale factors  
88 leading to a complex array of direct and indirect pathways across spatial scales,  
89 eventually leading to landscape wide variations in trophic community structure (Figure 1  
90 & 3).

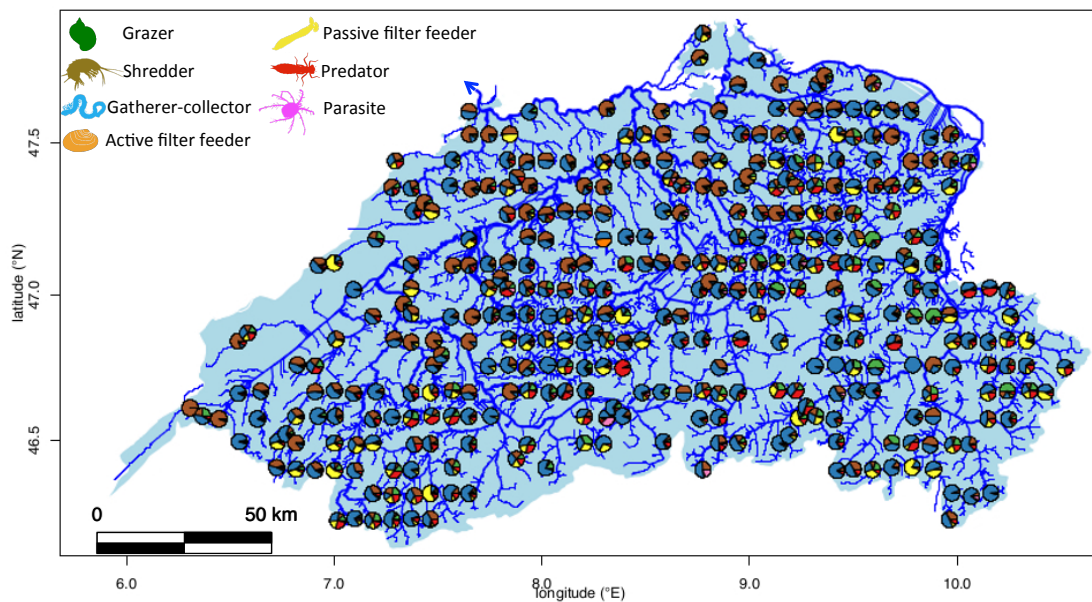

91  
92 **Figure 1.** Spatial variation in trophic structure of riverine macroinvertebrates. The figure shows the Rhine  
93 river basin. All 3<sup>rd</sup> order stream or larger are shown (arrow indicates direction of flows). Each pie chart  
94 represents the trophic structure (relative abundance of each trophic group in the community) for one of the  
95 364 sampling sites across the river basin. Each functional group is represented by a silhouette of one of its  
96 iconic taxon: Gatherer-collector (*Oligochaeta*), Grazer-scraper (*Limnaeidae*), Predator (*Cordulegaster*),  
97 Passive filter feeder (*Simuliidae*), Active filter feeder (*Sphaeridae*), Parasite (*Hydracaria*), Shredder  
98 (*Gammaridae*).

99

100 More specifically, altitude led to a decline in deciduous forest cover, was associated with  
101 an increase in distance to river outlet and drove land-use change from high settlement and  
102 agricultural lands to high altitudinal natural meadows (Figure 3). In turn, those regional  
103 factors influenced local habitats with transition to natural meadows leading to lower  
104 water foam levels (a proxy of eutrophication), and increased distance to outlet leading to  
105 higher turbidity level (Fig. 3). Lowland upstream sites were associated with higher  
106 probability of finding modified streams (see negative effects of altitude and positive  
107 effects of distance to outlet on river modification index on Figure 3). Local habitat factors  
108 then affected various trophic groups with mud level negatively impacting shredder,  
109 passive filter feeder and grazer-scraper abundances (Figure 3), foam (proxy of  
110 eutrophication) positively impacting gatherer-collector and passive filter feeder, river  
111 habitat modification positively influencing grazer-scraper, gatherer-collector and parasite,  
112 and higher riverbed variations in depth positively affecting passive filter feeder (Figure  
113 3). Finally, all those regional and local factors affected predator abundance through  
114 affecting their preys (Figure 3).

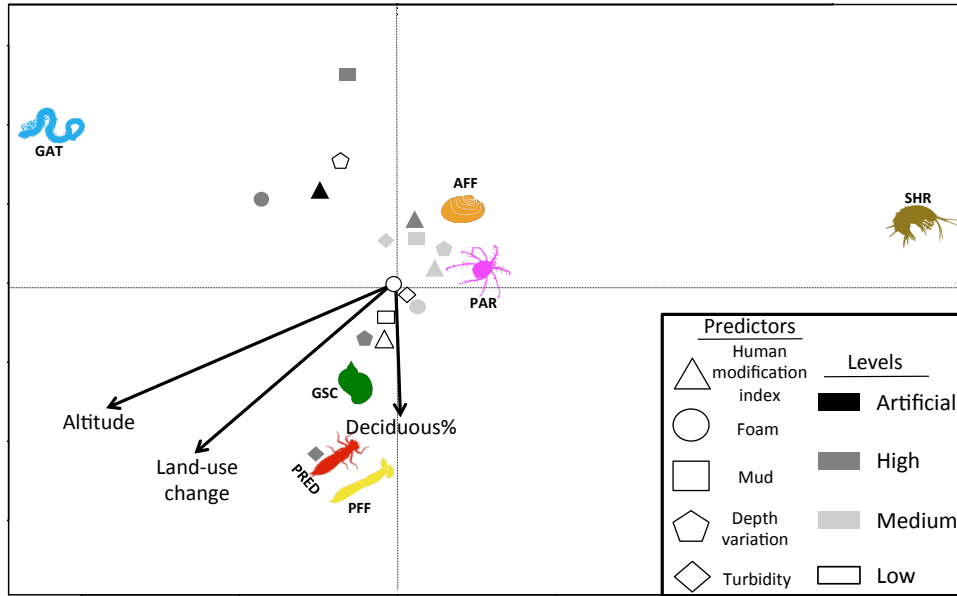

115

116 **Figure 2.** Main environmental and spatial drivers of riverine macroinvertebrate trophic structure. The  
117 ordination figure is the final db-RDA model selected by an automatic stepwise model building approach  
118 based on adjusted  $R^2$ . The first and second axes respectively explain 67% and 18% of the total variation in  
119 trophic structure (relative abundance of each trophic group *per* community, see Methods). A specific  
120 geometric shape represents each categorical predictor, with the gray gradient representing the level of each  
121 predictor. Each functional group is represented by a silhouette of one of its iconic taxon: GAT: Gatherer-  
122 collector (Oligochaeta), GSC: Grazer-scraper (Limnaeidae), PRED: Predator (*Cordulegaster*), PFF: Passive  
123 filter feeder (Simuliidae), AFF: Active filter feeder (Sphaeriidae), PAR: Parasite (Hydracaria), SHR:  
124 Shredder (Gammaridae).

125

126 We also found evidence for direct effects of regional factors on some trophic groups.

127 Altitude had a direct negative impact on passive filter feeder and shredder abundances

128 (Figure 3), potentially mediated by unmeasured (i.e., missing) local variables. Land-use

129 transition to natural meadows had a direct positive effect on predator abundance

130 suggesting that predators tend to fare better in high altitudinal streams surrounded by

131 natural meadows than in low altitude zones characterized by a matrix of agricultural

132 lands and human settlements, and a negative effect on grazer-scraper (Figure 3). Distance

133 to outlet directly influenced gatherer-collector and parasite abundances negatively

134 (Figure 3), illustrating that location along the river network has both indirect (mediated

135 by local habitat factors, see above) and direct effects on aquatic invertebrate trophic  
 136 structure.  
 137 There were also causal pathways among variables at each spatial scale as described above  
 138 for altitude and regional factors. Among local factors, river modifications negatively  
 139 impacted stream depth variation, which in turn, negatively influenced turbidity (Figure  
 140 3). Thus river modifications had an indirect positive effects on turbidity mediated by a  
 141 change in riverbed depth variation.  
 142

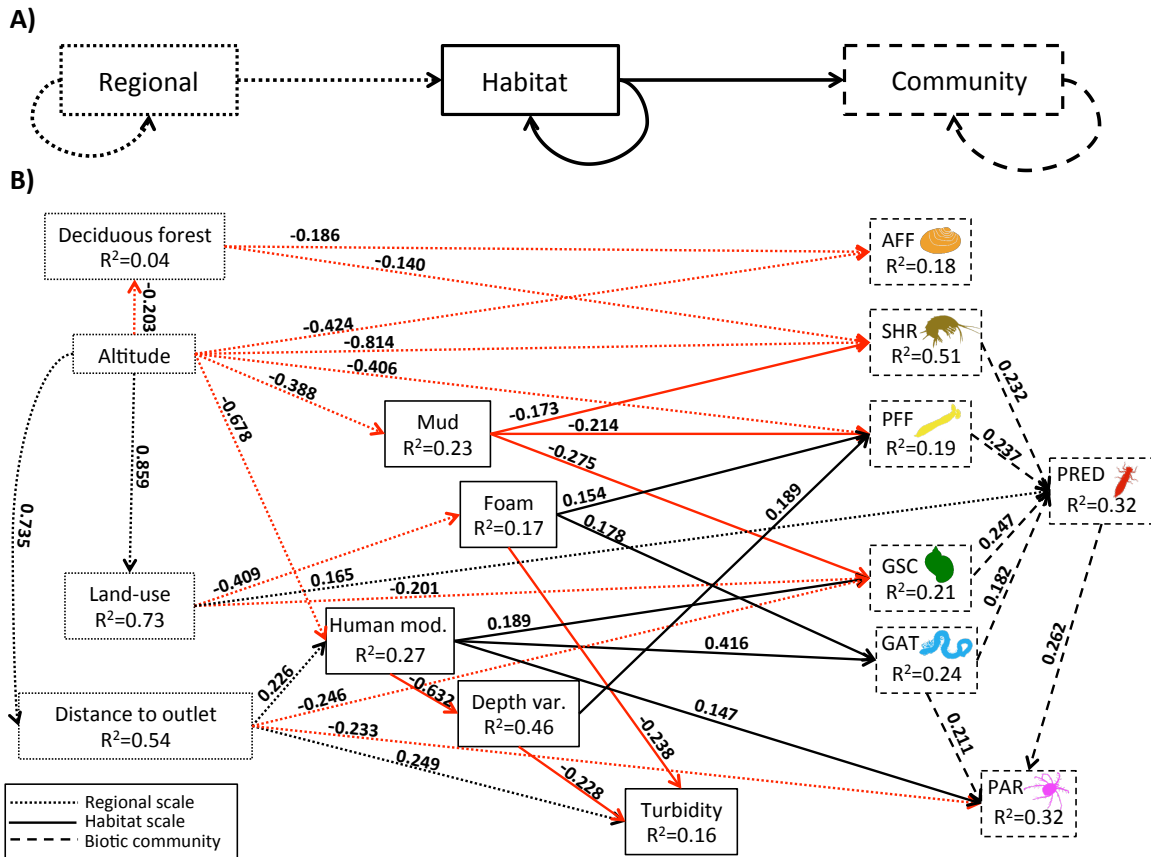

143

144 **Figure 3.** Direct and indirect pathways by which regional and local drivers influence riverine  
 145 macroinvertebrate trophic structure. A) We hypothesized that most regional (dotted lines) factors would  
 146 influence the biotic community (dashed lines) indirectly via an effect on local habitat factors (solid lines).  
 147 We also expected within spatial scale interaction structure at both regional and local scales (looped arrows).  
 148 Changes to biotic communities are usually analysed assuming that each predictor influence each taxa or  
 149 functional group in the community, however we hypothesized that the specific structure of interactions



150 within a biotic community would rather drive the propagation of effects from specific entry points (preys)  
151 to the entire community (looped arrow on the community box). B) Final structural equation model  
152 illustrating the different direct and indirect pathways by which regional (dotted lines) and local (solid line)  
153 factors interact and then propagate through the trophic community (dashed lines). Each value is the  
154 standardized coefficient (standardized estimate from each partial regression), representing the strength of  
155 the effect of one variable on another. Red arrows represent negative effects and black arrows positive ones.  
156 Each functional group is represented by a silhouette of one of its iconic taxon: GAT: Gatherer-collector  
157 (Oligochaeta), GSC: Grazer-scraper (Limnaeidae), PRED: Predator (*Cordulegaster*), PFF: Passive filter  
158 feeder (Simuliidae), AFF: Active filter feeder (Sphaeriidae), PAR: Parasite (Hydracaria), SHR: Shredder  
159 (Gammaridae).

160

161 Overall, our results illustrate the complex interactions among local and regional scale  
162 predictors in shaping trophic structure along an entire catchment (Figure 3) and how the  
163 outcome of those interactions across-scale generate the specific context in which each  
164 trophic group will thrive or not, leading to large spatial scale variations in trophic  
165 community structure (Figure 1 and 2).

166

## 167 **DISCUSSION**

168 Testing for the main environmental and spatial drivers of trophic structure in stream  
169 macroinvertebrates we found a complex array of direct and indirect pathways by which  
170 regional and local drivers interact to influence relative and absolute abundances of  
171 aquatic macroinvertebrate trophic groups, eventually leading to landscape wide variations  
172 in trophic community structure. More specifically, cascading effects across spatial scales  
173 starting with altitude as a key driver influencing other regional factors, which in turn  
174 affected various local habitat characteristics directly to influence trophic group  
175 abundances. Most effects propagated through the community by first affecting preys,  
176 which in turn, affected predator abundances.

177 The importance of the river network has been shown to be context-dependant as a  
178 function of location-specific conditions such as terrestrial land-use and biotic  
179 interactions<sup>14</sup>. Our results suggest that those location-specific conditions can, in part,  
180 interact with some river network properties because they are not distributed randomly  
181 along the network but rather located at specific substructures in the network. Those  
182 effects constitute in themselves indirect effects of the river network rather than the  
183 absence of effect. More specifically, we showed that distance to outlet affected trophic  
184 groups directly but also indirectly via its positive effect on the human modification index.  
185 A main component of this result is the observation that lowland headwater locations are  
186 systematically more affected by human-induced riverbed and riverbank modifications  
187 than headwaters at higher elevations. Consequently, our results illustrate how the  
188 significance of spatial and regional factors can be masked by location-specific conditions  
189 when indirect pathways are not being taken into account<sup>28</sup>.

190 Our results also emphasize the complex response of each individual trophic group (see  
191 Figure 3) to each individual environmental and spatial factor. Interpreting any of these  
192 patterns independently can thus be misleading and only an integrative approach allows a  
193 coherent understanding of community structure, and eventually predicting shifts in  
194 response to multiple environmental changes<sup>24,28,29</sup>. Although our predictors are  
195 hierarchically organized (e.g., regional factors influencing local factors influencing preys,  
196 which in turn impact predators) rather than multiplicative, our study echoes recent calls to  
197 take a more integrative approach to the study of multiple-stressors and environmental  
198 changes, especially in aquatic ecosystems<sup>25,30-32</sup>.

199 Shifts in trophic structure are a well-known driver of ecosystem processes<sup>33–36</sup>. Predicting  
200 those shifts, however, is a challenging endeavour because of multiple stressors interacting  
201 at different spatial scales and potentially affecting different trophic levels simultaneously.  
202 Our results suggest that effects mainly spread from preys to predators across the whole  
203 river network, and we observed important shifts in trophic group's relative abundances.  
204 For instance, our ordination analysis identified an important gradient from gatherer-  
205 collector-dominated to shredder-dominated communities (see Figures 1 & 2). This  
206 observation is also visible with the structural equation modeling where higher gatherer-  
207 collector abundance is mainly associated with high levels of riverbed and bank  
208 modifications, while shredders seem to thrive in less disturbed environments (Figures 2 &  
209 3). At the functional level, we postulate that this shift from coarse (shredder) to fine  
210 particle (gatherer-collector) feeders along those environmental gradients is linked to  
211 variations in the type of resource available<sup>37</sup>. Such shifts in trophic structures have also  
212 implications for energy transfer and stoichiometric constraints in the community because  
213 shredders mainly feed on allochthonous leaf particles, which tend to be rich in carbon but  
214 nitrogen poor, while fine particles associated to agricultural lands tend to be nutrient rich  
215 but a poorer source of carbon.

216 Looking at the functional or trophic structure of communities is an essential step to better  
217 understand the effects of environmental perturbations on biodiversity and ecosystem  
218 functions, but also to eventually better predict the strength and direction of those  
219 effects<sup>26,27,38</sup>. Our results illustrate the complex interactions among local and regional  
220 scale predictors in driving trophic structure and how the outcome of those interactions

221 across-scale generate the observed large scale variations in aquatic trophic community  
222 structure.

223

## 224 **METHODS**

### 225 **Data**

226 Our study used the aquatic macroinvertebrate abundance data from 364 sites across the  
227 whole Rhine river catchment in Switzerland, covering about 30,000 km<sup>2</sup> and eventually  
228 flowing into the North Sea. The data is collected and curated by a Swiss governmental  
229 monitoring program (“Biodiversity Monitoring in Switzerland BDM”; BDM  
230 Coordination Office, 2014). Sampling is done following a systematic sampling grid, and  
231 was conducted in wadeable streams, 2<sup>nd</sup> order or larger in size, thus excluding standing  
232 waterbodies, 1<sup>st</sup> order streams and large rivers inaccessible by wading<sup>39</sup>. Each site was  
233 sampled once between 2009–2014 with seasonal timing of sampling adjusted with  
234 respect to elevation: the sampling period for a site was based on local phenology so as to  
235 collect as many macroinvertebrate taxa as possible for a given elevation<sup>39</sup>.

236 The survey was done using a standard kick-net (25 x 25 cm, 500 µm mesh) sampling  
237 procedure defined in the Swiss “Macrozoobenthos Level I” module for stream benthic  
238 macroinvertebrates (BDM Coordination Office, see <sup>39,40</sup>). Briefly, a total of eight kick-net  
239 samples were taken at each site to cover all major microhabitats within a predefined  
240 section of the river (area covered per site was width x 10 times the average width in  
241 length). Therefore, all locally represented habitat types (including various sediment types  
242 such as rocks, pebbles, sand, mud, submerged roots, macrophytes, leaf litter and artificial  
243 river-beds) and water velocities were sampled. Samples were preserved in 80% ethanol

244 and returned to the laboratory for processing. In the laboratory, all macroinvertebrates  
245 used in this study were sorted and identified to the family level by trained taxonomists  
246 (total of 63 families see Table S1 for a list). For further details on the sampling method  
247 and the database, see also <sup>40-42</sup>.

248

## 249 **Predictors**

250 We used 38 predictors representative of regional, local and hydrological conditions, as  
251 well as land-use coverage and position in the dendritic network (see Table S2 for a  
252 complete list of each variable with description). Regional predictors included altitude at  
253 the sampling site and catchment size. Local predictors represent instream habitat  
254 conditions that were measured directly at sampling site. Local predictors included  
255 features of channel cross-section (e.g., width, depth, and their variability), riverbed  
256 conditions (e.g., mud deposition and attached algae), aquatic conditions (e.g., turbidity  
257 and dissolved iron sulfide concentration), and a discrete ranking of human alterations to  
258 riverbank and riverbed (see <sup>39</sup> for details). Hydrological predictors are factors  
259 representing geometry conditions of the river network in the upstream catchment of a  
260 sampling site. Those predictors included geomorphological (e.g., riverbed slope),  
261 hydrological (e.g., mean discharge) and chemical (e.g., inflowing wastewater volume)  
262 conditions. Land use predictors represent terrestrial conditions surrounding a sampling  
263 site. Those predictors included 6 land use classes considering adjacent influences to the  
264 local site with a lateral buffer distance of either 500 meters, 1, 5, 10, 100 or 1000  
265 kilometers<sup>42</sup>. We know from previous work on this data that the 5 km scale is most  
266 significant in affecting stream invertebrate diversity<sup>24</sup>, thus we used only the 6 land use

267 classes with lateral buffer distance of 5 kilometers in our analyses. Network predictors  
268 represent the position of each sampling site in the river dendritic network (e.g., centrality  
269 and distance to the outlet).

270 Many land use predictors were strongly skewed toward zero leading to important loss of  
271 information and degrees of freedom when analysing each variable individually. Instead,  
272 to emphasize a more continuous transition between each land-use type, for further  
273 analysis, we used scores from a canonical correspondence analysis representing a gradual  
274 shift in land-use from high proportion of human settlement and agricultural lands to high  
275 proportion of natural meadows (see Fig. S1). Such gradient is dominant in Switzerland  
276 with low lands representing most of the urban and agricultural lands. Grouping our land-  
277 use data this way reduced our total number of predictors to 34 for 364 sites.

278

### 279 **Trophic structure**

280 We built the trophic structure of each stream macroinvertebrate community for each site,  
281 using the ‘freshwaterecology’ European database<sup>43</sup> and extracting the ‘feeding type’  
282 metric (*sensu*<sup>44</sup>) for each of our 63 stream macroinvertebrate families. The data from the  
283 ‘freshwaterecology’ database was at the species level. Thus, we used averaged values  
284 across all species within family to determine the dominant feeding type of each 63  
285 family. At the end, our data was comprised of abundance data for 63 families across  
286 seven functional feeding groups (following definition by<sup>44</sup>, see Table S1) defining  
287 overall trophic structure. The seven groups were: grazer scrapers (13 families, mainly  
288 feeding on particulate organic matter from endolithic and epilithic algal tissues and  
289 biofilm), shredders (10 families, mainly feeding on coarse particulate organic matter from

290 fallen leaves and plant tissue), gatherer collectors (10 families, mainly feeding on  
291 sedimented fine particulate organic matter), active filter feeders (1 family, mainly feeding  
292 on suspended particulate organic matter actively filtered from the water column), passive  
293 filter feeders (2 families, mainly feeding on suspended particulate organic matter  
294 passively trapped from running water), predators (24 families, mainly feeding on preys),  
295 and parasites (2 families, mainly feeding from hosts).

296

## 297 **Analyses**

### 298 *Ordination*

299 To identify the main environmental and spatial drivers of the trophic structure of stream  
300 macroinvertebrate communities we used a distance-based redundancy analysis on  
301 Euclidean distances (db-RDA, following<sup>45</sup>) followed by an automatic stepwise model  
302 building approach for constrained ordination based on the adjusted  $R^2$  of the full model  
303 (499 permutations, following<sup>46</sup>). The significance level at  $P < 0.05$  of the final model, and  
304 of each selected term were tested using a permutation ANOVA (200 permutations). The  
305 uses of pairwise Euclidean distances ensure that our analyses really emphasize changes in  
306 the relative proportion of each trophic group within each community rather than between  
307 site changes in absolute abundance or composition<sup>47</sup>. Because we did not have any *a*  
308 *priori* knowledge on which predictors might be most important, we used all 34 predictors  
309 into our analytical pipeline. At the end 8 predictors were selected with first and second  
310 axes respectively explaining 67% and 18% of the total variance for the constrained axes.

### 311 *Structural equation model*

312 Ordination approaches provide insightful information on main drivers, however they do  
313 not provide information on the potential interactions and pathways by which each driver  
314 affect different trophic levels. For instance, a regional factor such as altitude does not  
315 have any direct ecological relevance. Rather, altitude will affect trophic groups via its  
316 effects on local factors (e.g., temperature or deciduous forest cover). Thus, even variables  
317 that may seem less important at first might act as transmission belts for the effects of  
318 other factors on stream invertebrate trophic structure. Moreover, factors affecting  
319 predators can do so by affecting the predator directly (e.g., high turbidity decreasing  
320 hunting efficiency) or indirectly by affecting its preys. Based on the information from the  
321 db-RDA analysis, we built a meta-model representing the potential links of importance in  
322 the system and how they affect trophic structure. We hypothesized that effects would  
323 mainly cascade from regional factors affecting local factors which in turn affect different  
324 trophic group (Fig. 1a). We then used structural equation modeling to test the fit of this  
325 initial meta-model against the data. Subsequently, we used the residual co-variance  
326 matrix and modification indices<sup>48</sup> to identify potentially important missing links that were  
327 not included in the original meta-model. After adding those links to the model we then  
328 identified and pruned least important links (based on p-values and effect on model fit) to  
329 avoid over-parameterization and over estimation of explanatory power. Because we used  
330 categorical factors, we measured the fit of our model to the data with a robust diagonally  
331 weighted least square estimator (DWLS, see <sup>48</sup>). Our final model converged after 105  
332 iterations and showed a good fit to the data (n = 364, DWLS = 63.36, Degree of freedom  
333 = 62, P = 0.428).

334 All analyses were conducted with R 3.1.2 (R Core Team 2016), using the ‘vegan’



335 package<sup>49</sup> for the db-RDA (‘capscale’ function) and stepwise model building (‘ordistep’  
336 function), the ‘igraph’ package<sup>50</sup> to compute network metrics, and the ‘lavaan’ package<sup>48</sup>  
337 for SEM analysis.

338

### 339 **Acknowledgement**

340 The Swiss Federal Office for the Environment (BAFU) provided the BDM data. We  
341 thank Roman Alther for discussion and for help in extracting GIS data. We thank the  
342 many people who conducted field and laboratory work within the biodiversity monitoring  
343 programme, and Nicolas Martinez and Tobias Roth for help in data provisioning.  
344 Funding was provided by the Swiss National Science Foundation Grants PP00P3\_150698  
345 and PP00P3\_179089 (to F.A.).

346 **References**

- 347 1. Vannote, R. L., Minshall, G. W., Cummins, K. W., Sedell, J. R. & Cushing, C. E.  
348 The River Continuum Concept. *Can. J. Fish. Aquat. Sci.* **37**, 130–137 (1980).
- 349 2. Rodriguez-Iturbe, I. & Rinaldo, A. *Fractal River Basins: Chance and Self-*  
350 *Organization*. (Cambridge University Press, 1997).
- 351 3. Tonkin, J. D. *et al.* The role of dispersal in river network metacommunities: Patterns,  
352 processes, and pathways. *Freshw. Biol.* **63**, 141–163 (2018).
- 353 4. Abbott, B. W. *et al.* Unexpected spatial stability of water chemistry in headwater  
354 stream networks. *Ecol. Lett.* **21**, 296–308 (2018).
- 355 5. Tonkin, J. D., Merritt, D. M., Olden, J. D., Reynolds, L. V. & Lytle, D. A. Flow  
356 regime alteration degrades ecological networks in riparian ecosystems. *Nat. Ecol.*  
357 *Evol.* **2**, 86–93 (2018).
- 358 6. Bartels, P. *et al.* Reciprocal subsidies between freshwater and terrestrial ecosystems  
359 structure consumer resource dynamics. *Ecology* **93**, 1173–1182 (2012).
- 360 7. Richardson, J. S. & Sato, T. Resource subsidy flows across freshwater–terrestrial  
361 boundaries and influence on processes linking adjacent ecosystems. *Ecohydrology* **8**,  
362 406–415 (2015).
- 363 8. Minshall G. Wayne. Role of Allochthonous Detritus in the Trophic Structure of a  
364 Woodland Springbrook Community. *Ecology* **48**, 139–149 (1967).
- 365 9. Woodward, G. & Hildrew, A. G. Food web structure in riverine landscapes. *Freshw.*  
366 *Biol.* **47**, 777–798 (2002).
- 367 10. Muneeppeerakul, R. *et al.* Neutral metacommunity models predict fish diversity  
368 patterns in Mississippi–Missouri basin. *Nature* **453**, 220–222 (2008).

- 369 11. Carrara, F., Altermatt, F., Rodriguez-Iturbe, I. & Rinaldo, A. Dendritic connectivity  
370 controls biodiversity patterns in experimental metacommunities. *Proc. Natl. Acad.*  
371 *Sci.* **109**, 5761–5766 (2012).
- 372 12. Woodward, G. *et al.* Continental-Scale Effects of Nutrient Pollution on Stream  
373 Ecosystem Functioning. *Science* **336**, 1438–1440 (2012).
- 374 13. Romanuk, T. N., Jackson, L. J., Post, J. R., McCauley, E. & Martinez, N. D. The  
375 structure of food webs along river networks. *Ecography* **29**, 3–10 (2006).
- 376 14. Tonkin, J. D., Heino, J., Sundermann, A., Haase, P. & Jähnig, S. C. Context  
377 dependency in biodiversity patterns of central German stream metacommunities.  
378 *Freshw. Biol.* **61**, 607–620 (2016).
- 379 15. Tonkin, J. D., Heino, J. & Altermatt, F. Metacommunities in river networks: The  
380 importance of network structure and connectivity on patterns and processes. *Freshw.*  
381 *Biol.* **63**, 1–5 (2018).
- 382 16. Heino, J. *et al.* A comparative analysis reveals weak relationships between ecological  
383 factors and beta diversity of stream insect metacommunities at two spatial levels.  
384 *Ecol. Evol.* **5**, 1235–1248 (2015).
- 385 17. McGill, B. J., Enquist, B. J., Weiher, E. & Westoby, M. Rebuilding community  
386 ecology from functional traits. *Trends Ecol. Evol.* **21**, 178–185 (2006).
- 387 18. Mayfield, M. M. & Stouffer, D. B. Higher-order interactions capture unexplained  
388 complexity in diverse communities. *Nat. Ecol. Evol.* **1**, 0062 (2017).
- 389 19. Cottenie, K. Integrating environmental and spatial processes in ecological community  
390 dynamics. *Ecol. Lett.* **8**, 1175–1182 (2005).

- 391 20. Cottenie, K., Michels, E., Nuytten, N. & Meester, L. D. Zooplankton metacommunity  
392 structure: regional vs. local processes in highly interconnected ponds. *Ecology* **84**,  
393 991–1000 (2003).
- 394 21. Göthe, E., Angeler, D. G. & Sandin, L. Metacommunity structure in a small boreal  
395 stream network. *J. Anim. Ecol.* **82**, 449–458 (2013).
- 396 22. Kuglerová, L., Jansson, R., Sponseller, R. A., Laudon, H. & Malm-Renöfält, B. Local  
397 and regional processes determine plant species richness in a river-network  
398 metacommunity. *Ecology* **96**, 381–391 (2014).
- 399 23. Borthagaray, A. I., Berazategui, M. & Arim, M. Disentangling the effects of local and  
400 regional processes on biodiversity patterns through taxon-contingent metacommunity  
401 network analysis. *Oikos* **124**, 1383–1390 (2015).
- 402 24. Masahiro, R., Harvey, E., Robinson, C. T. & Altermatt, F. Nonlinear higher order  
403 abiotic interactions explain riverine biodiversity. *J. Biogeogr.* **45**, 628–639 (2018).
- 404 25. Jackson, M. C., Loewen, C. J. G., Vinebrooke, R. D. & Chimimba, C. T. Net effects  
405 of multiple stressors in freshwater ecosystems: a meta-analysis. *Glob. Change Biol.*  
406 **22**, 180–189 (2016).
- 407 26. Hillebrand Helmut *et al.* Biodiversity change is uncoupled from species richness  
408 trends: Consequences for conservation and monitoring. *J. Appl. Ecol.* **55**, 169–184  
409 (2017).
- 410 27. Cernansky, R. Biodiversity moves beyond counting species. *Nat. News* **546**, 22  
411 (2017).
- 412 28. Grace, J. B. *et al.* Integrative modelling reveals mechanisms linking productivity and  
413 plant species richness. *Nature* **529**, 390–393 (2016).

- 414 29. Peterson, R. O., Vucetich, J. A., Bump, J. M. & Smith, D. W. Trophic Cascades in a  
415 Multicausal World: Isle Royale and Yellowstone. *Annu. Rev. Ecol. Evol. Syst.* **45**,  
416 325–345 (2014).
- 417 30. Ormerod, S. J., Dobson, M., Hildrew, A. G. & Townsend, C. R. Multiple stressors in  
418 freshwater ecosystems. *Freshw. Biol.* **55**, 1–4 (2010).
- 419 31. Beermann, A. J. *et al.* Multiple-stressor effects on stream macroinvertebrate  
420 communities: A mesocosm experiment manipulating salinity, fine sediment and flow  
421 velocity. *Sci. Total Environ.* **610–611**, 961–971 (2018).
- 422 32. Elbrecht, V. *et al.* Multiple-stressor effects on stream invertebrates: a mesocosm  
423 experiment manipulating nutrients, fine sediment and flow velocity. *Freshw. Biol.* **61**,  
424 362–375 (2016).
- 425 33. Emmett Duffy, J., Paul Richardson, J. & France, K. E. Ecosystem consequences of  
426 diversity depend on food chain length in estuarine vegetation. *Ecol. Lett.* **8**, 301–309  
427 (2005).
- 428 34. Harvey, E., Séguin, A., Nozais, C., Archambault, P. & Gravel, D. Identity effects  
429 dominate the impacts of multiple species extinctions on the functioning of complex  
430 food webs. *Ecology* **94**, 169–179 (2013).
- 431 35. Poisot, T., Mouquet, N. & Gravel, D. Trophic complementarity drives the  
432 biodiversity–ecosystem functioning relationship in food webs. *Ecol. Lett.* **16**, 853–  
433 861 (2013).
- 434 36. Trzcinski, M. K. *et al.* The effects of food web structure on ecosystem function  
435 exceeds those of precipitation. *J. Anim. Ecol.* **85**, 1147–1160 (2016).

- 436 37. Lepori, F. & Malmqvist, B. Predictable changes in trophic community structure along  
437 a spatial disturbance gradient in streams. *Freshw. Biol.* **52**, 2184–2195 (2007).
- 438 38. Harvey, E., Gounand, I., Ward, C. L. & Altermatt, F. Bridging ecology and  
439 conservation: from ecological networks to ecosystem function. *J. Appl. Ecol.* **54**,  
440 371–379 (2016).
- 441 39. Stucki, P. *Méthodes d'analyse et d'appréciation des cours d'eau en Suisse.*  
442 *Macrozoobenthos - niveau R.* 61 (Office federal de l'environnement, 2010).
- 443 40. Altermatt, F., Seymour, M. & Martinez, N. River network properties shape  $\alpha$ -  
444 diversity and community similarity patterns of aquatic insect communities across  
445 major drainage basins. *J. Biogeogr.* **40**, 2249–2260 (2013).
- 446 41. Kaelin, K. & Altermatt, F. Landscape-level predictions of diversity in river networks  
447 reveal opposing patterns for different groups of macroinvertebrates. *Aquat. Ecol.* **50**,  
448 283–295 (2016).
- 449 42. Seymour, M., Deiner, K. & Altermatt, F. Scale and scope matter when explaining  
450 varying patterns of community diversity in riverine metacommunities. *Basic Appl.*  
451 *Ecol.* **17**, 134–144 (2016).
- 452 43. Schmidt-Kloiber, A. & Hering, D. [www.freshwaterecology.info](http://www.freshwaterecology.info) – An online tool that  
453 unifies, standardises and codifies more than 20,000 European freshwater organisms  
454 and their ecological preferences. *Ecol. Indic.* **53**, 271–282 (2015).
- 455 44. Moog, O. *Fauna Aquatica Austriaca.* (Bundesministerium für Land- und  
456 Forstwirtschaft, 1995).

- 457 45. Legendre, P. & Anderson, M. J. Distance-Based Redundancy Analysis: Testing  
458 Multispecies Responses in Multifactorial Ecological Experiments. *Ecol. Monogr.* **69**,  
459 1–24 (1999).
- 460 46. Blanchet, F. G., Legendre, P. & Borcard, D. Forward Selection of Explanatory  
461 Variables. *Ecology* **89**, 2623–2632 (2008).
- 462 47. Anderson, M. J. *et al.* Navigating the multiple meanings of  $\beta$  diversity: a roadmap for  
463 the practicing ecologist. *Ecol. Lett.* **14**, 19–28 (2011).
- 464 48. Rosseel, Y. lavaan: An R package for structural equation modeling. *J. Stat. Softw.* **48**,  
465 1–36 (2012).
- 466 49. Oksanen, J. *et al.* *vegan: Community Ecology Package.* (2015).
- 467 50. Csardi, G. & Nepusz, T. The igraph software package for complex network research.  
468 *InterJournal Complex Systems*, 1695 (2006).
- 469
- 470
- 471

472 **Table 1.** Permutation ANOVA (200 permutations) on the final db-RDA model.

|                   | Df  | SS    | F     | <i>P</i> -value |
|-------------------|-----|-------|-------|-----------------|
| Altitude          | 1   | 3.63  | 22.75 | 0.001           |
| Human Mod. Ind.   | 3   | 2.16  | 4.51  | 0.001           |
| Foam level        | 2   | 0.97  | 3.04  | 0.006           |
| Mud level         | 2   | 0.88  | 2.75  | 0.004           |
| Land-use gradient | 1   | 0.81  | 5.10  | 0.001           |
| Depth variation   | 2   | 0.95  | 2.98  | 0.012           |
| Deciduous cover   | 1   | 0.60  | 3.80  | 0.011           |
| Turbidity level   | 2   | 0.72  | 2.27  | 0.031           |
| Residual          | 193 | 30.86 |       |                 |

473
